# Supplementary material
Source: PubMed Central journal article supplement (PMC7453836)

**Appendix**  
**Menthol Smoking Patterns and Smoking Perceptions Among Youth:**  
**Findings From the Population Assessment of Tobacco and Health Study**  
**Cohn et al.**

**Appendix Figure 1.** Conceptual model of the associations among menthol initiation (first cigarette was a menthol), perceived ease of smoking menthol, smoking-related harm perceptions, and more regular use.

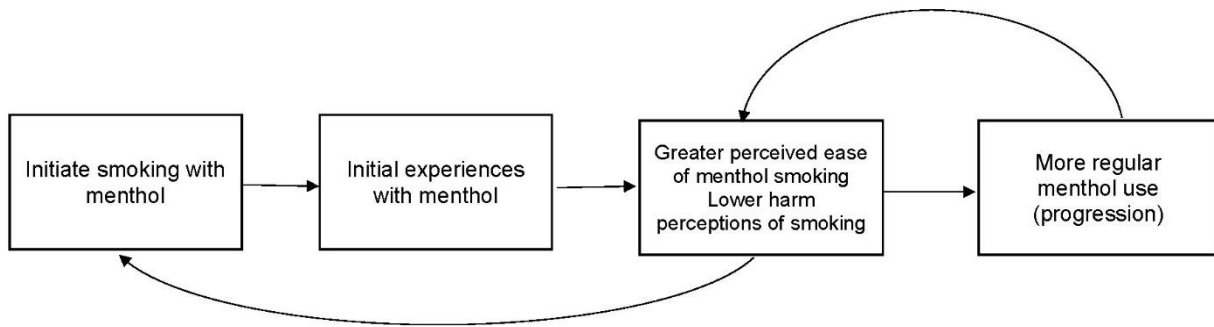

Supplement: NIHMS1613914-supplement-Supplemental_figure.pdf [file NIHMS1613914-supplement-Supplemental_figure.pdf]
